# Supplementary material
Source: publisher figshare collection journal article supplement (https://acs.figshare.com/ndownloader/files/5734962)
Supplement: Supplementary file 1 [file 5734962]

# Electrochemically-Driven Formation of a Molecular Capsule around the Ferrocenium Ion

Ivy E. Philip and Angel E. Kaifer\*

*Center for Supramolecular Science and Department of Chemistry, University of Miami, Coral Gables, FL 33124-0431*

## SUPPORTING INFORMATION

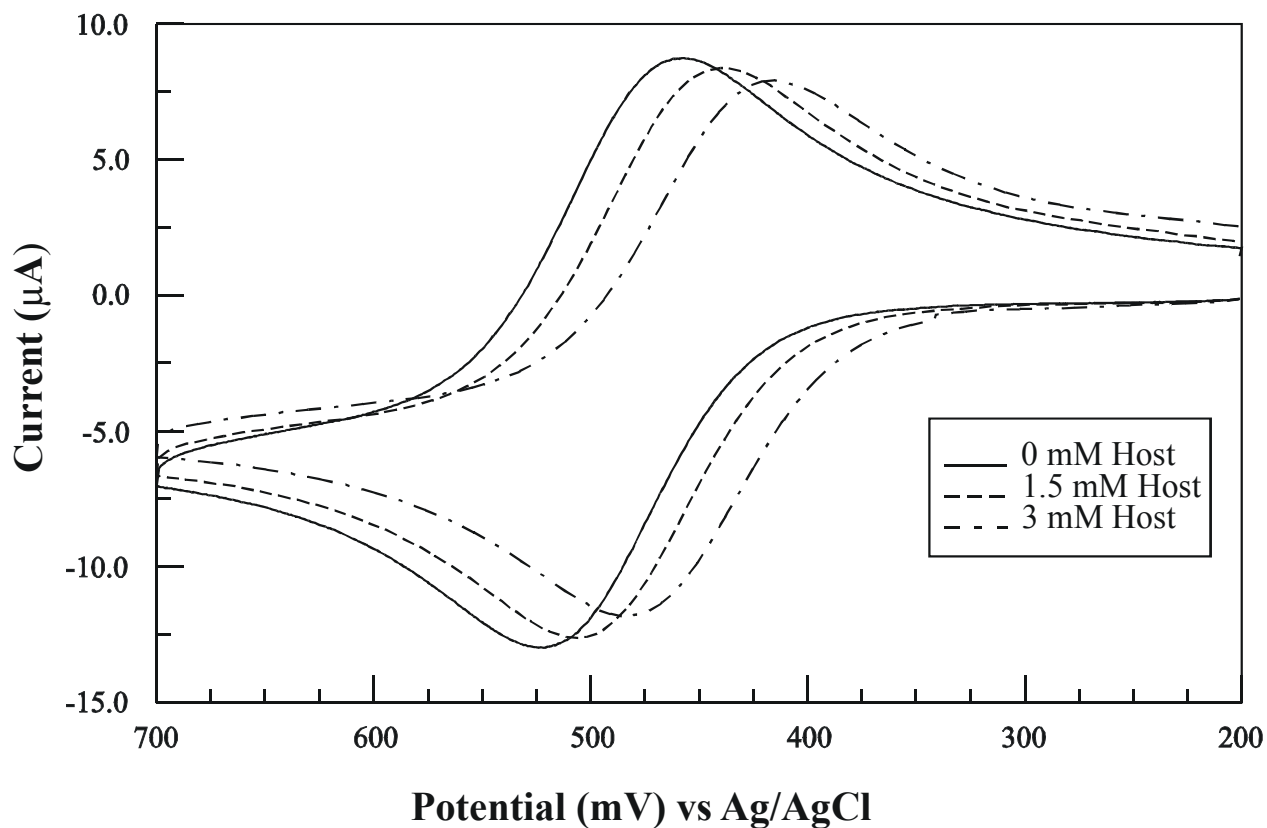

**Figure SI1.** Cyclic voltammetric response on glassy carbon (0.071 cm<sup>2</sup>) of a CH<sub>2</sub>Cl<sub>2</sub> solution containing 0.5 mM ferrocene, variable concentrations of host **2** and 0.1M TDA<sup>+</sup>PF<sub>6</sub><sup>-</sup>. Scan rate: 0.1 V/s. From digital simulations, we estimate that the binding constant between ferrocenium and **2** is  $40 \pm 15$  L/mol.

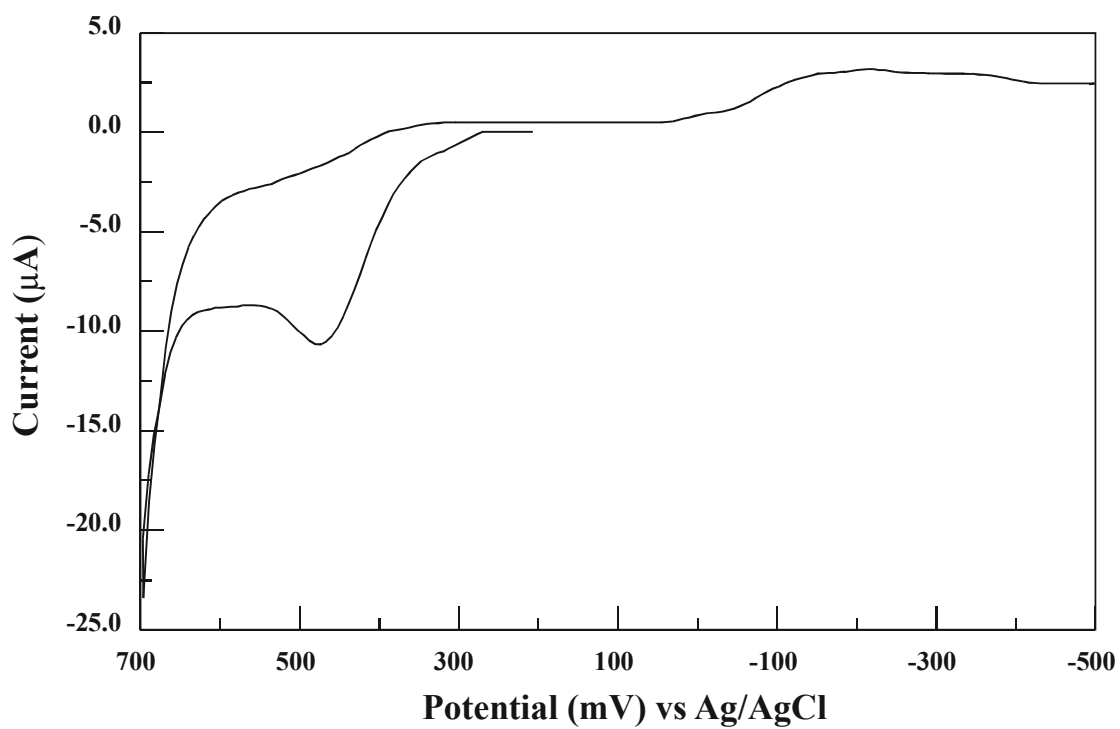

**Figure SI2.** Cyclic voltammetric response with an extended cathodic scan. The solution contains 0.5 mM ferrocene, 3.0 mM host **2** and 0.1 M TDA<sup>+</sup>Br<sup>-</sup> in CH<sub>2</sub>Cl<sub>2</sub>. Scan rate: 0.1 V/s.

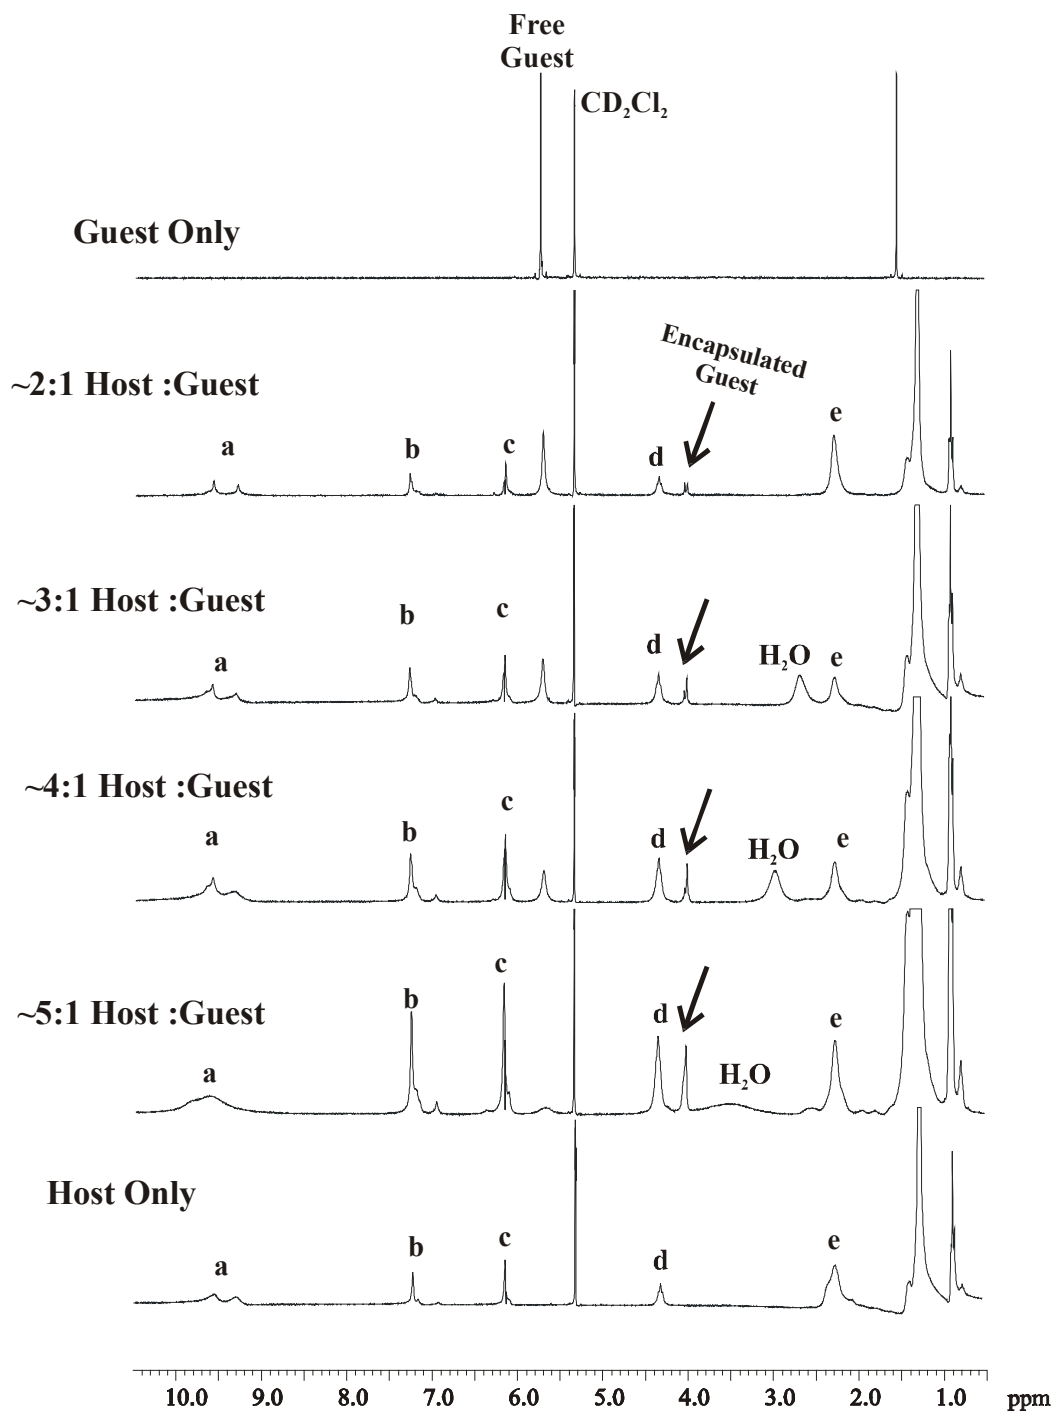

**Figure SI3.**  $^1\text{H}$  NMR spectra (400 MHz,  $\text{CD}_2\text{Cl}_2$ ) of guest  $\text{Cob}^+\cdot\text{PF}_6^-$  and host **2** at various relative concentrations. For proton assignments, see Chart 1.

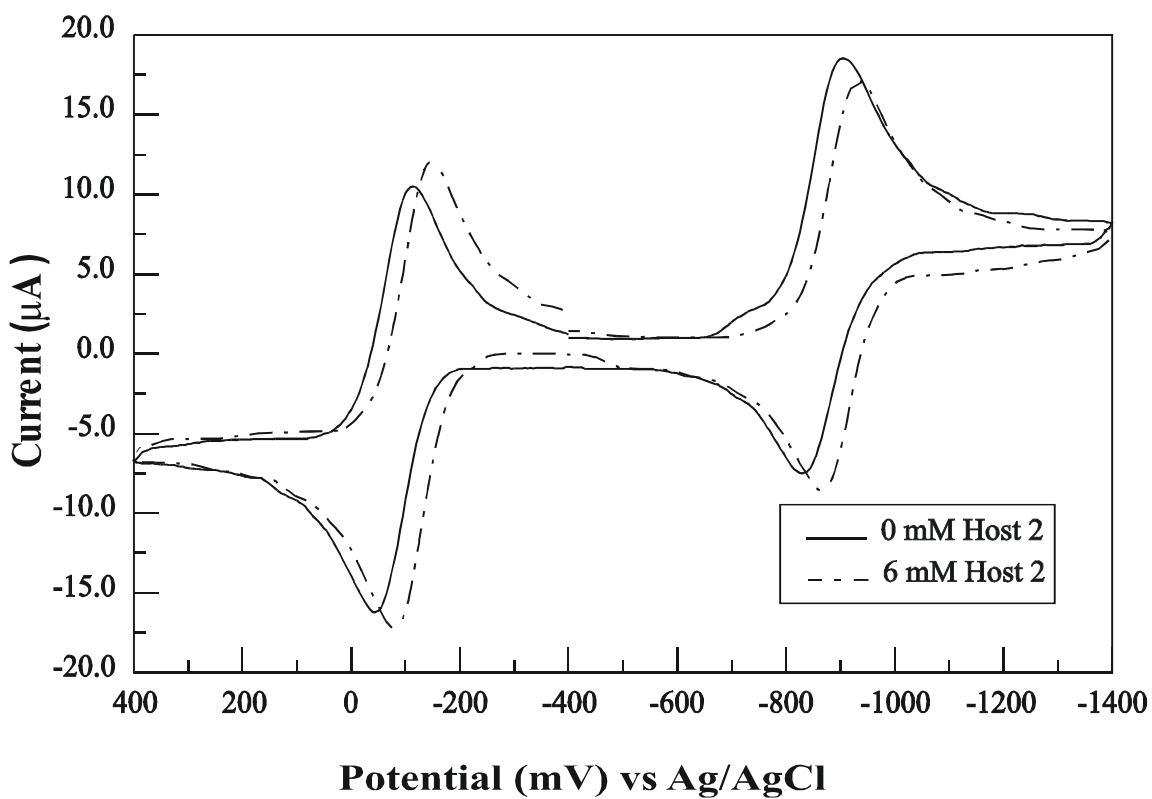

**Figure SI4.** Cyclic voltammetric response on a glassy carbon electrode ( $0.071 \text{ cm}^2$ ) of a  $0.1 \text{ M TBA}^+\text{PF}_6^-/\text{CH}_2\text{Cl}_2$  solution containing  $1.0 \text{ mM}$  decamethylferrocene,  $1.0 \text{ mM Cob}^+\text{PF}_6^-$  and variable concentrations of host **2**. Scan rate:  $0.1 \text{ V/s}$ .
